# Supplementary material
Source: publisher figshare collection journal article supplement (https://gsajournals.figshare.com/articles/dataset/_/10252856)

— D —  $E_{AA}$  —  $E_{DD}$  —  $E_C$  —  $E_M$

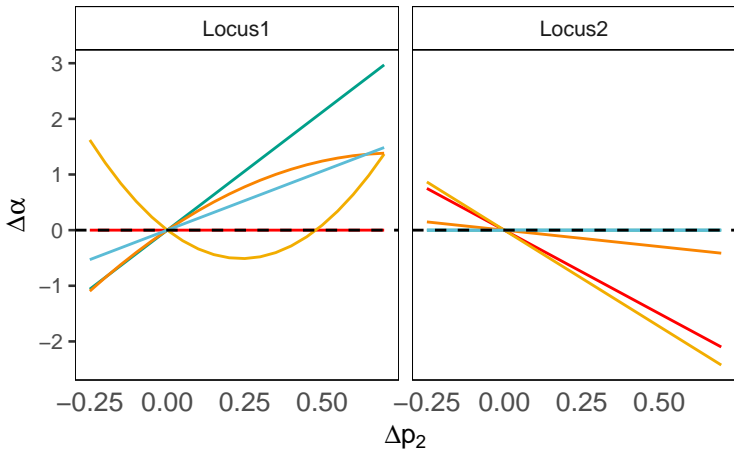

Supplement: Supplementary file 1 [file 2]

Magnitude — none — small — intermediate — large

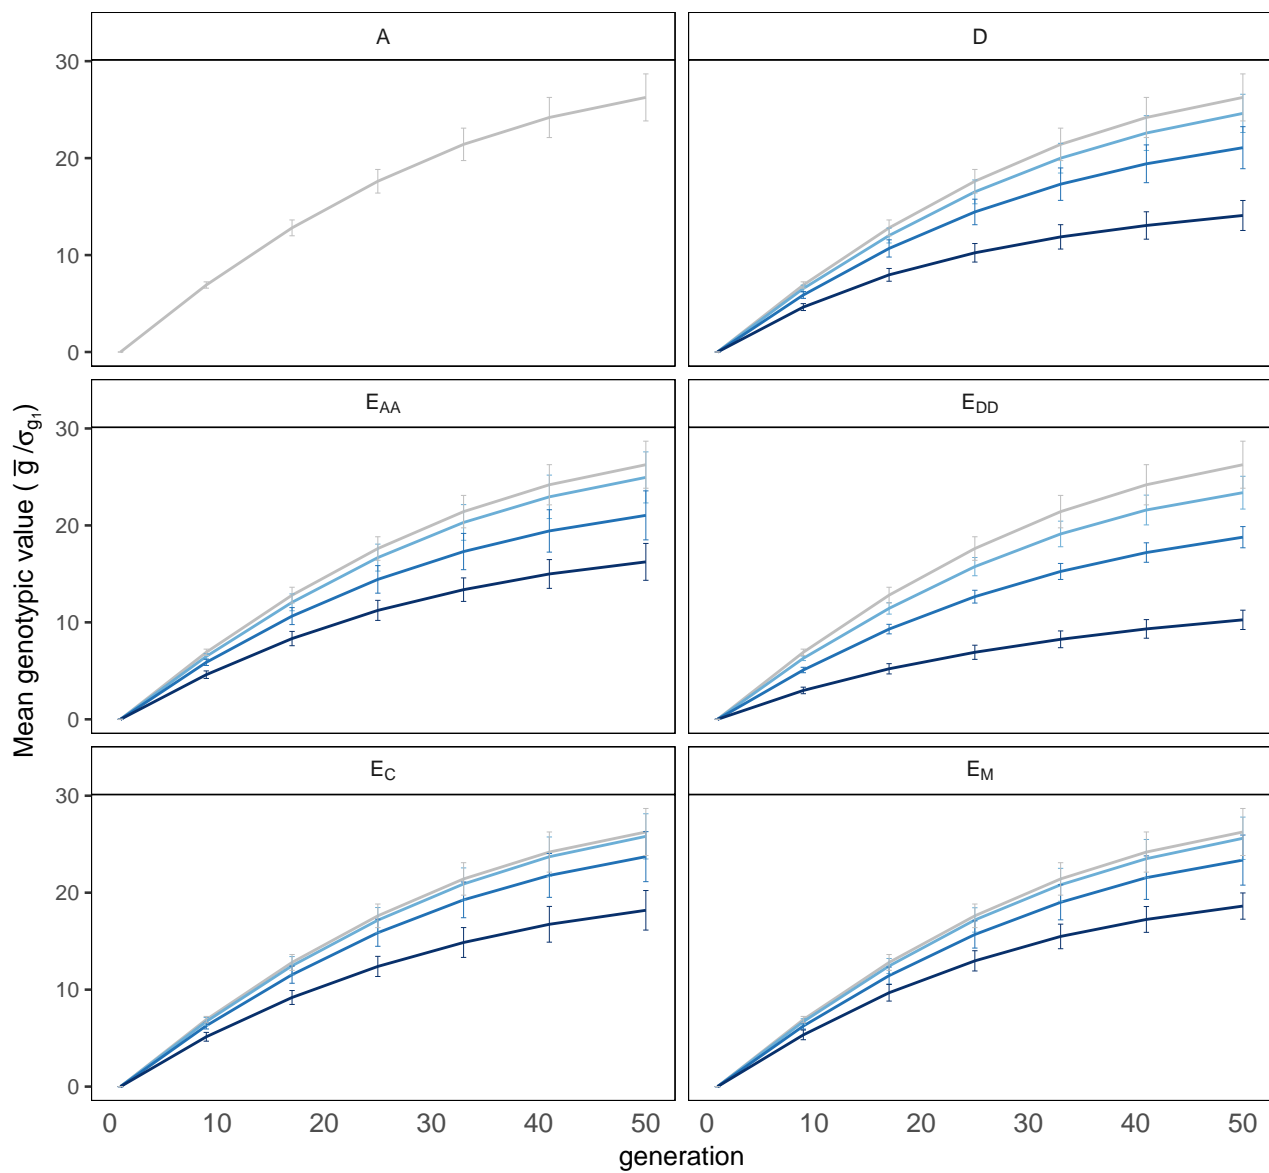

Supplement: Supplementary file 2 [file 2]

Magnitude    small    intermediate    large

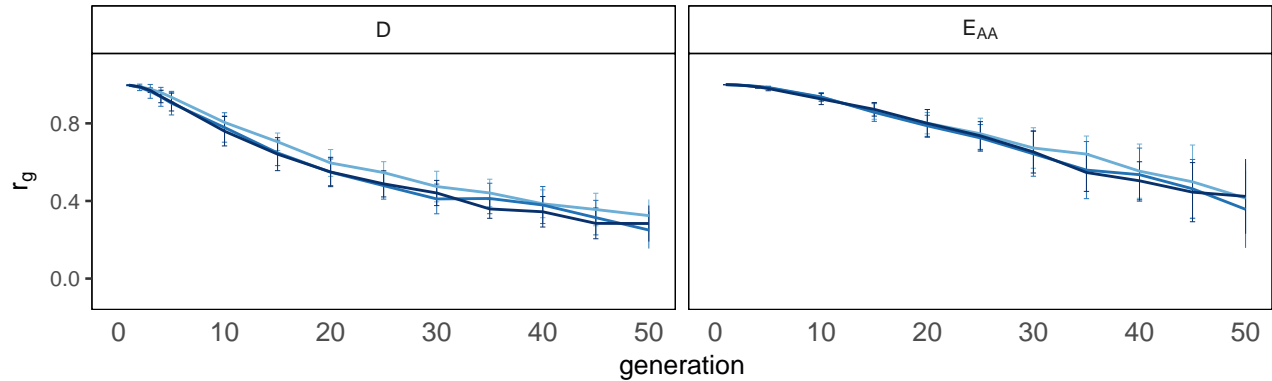

Supplement: Supplementary file 3 [file 2]

$\alpha$   $\Delta\alpha$   $\Delta\alpha/\alpha$

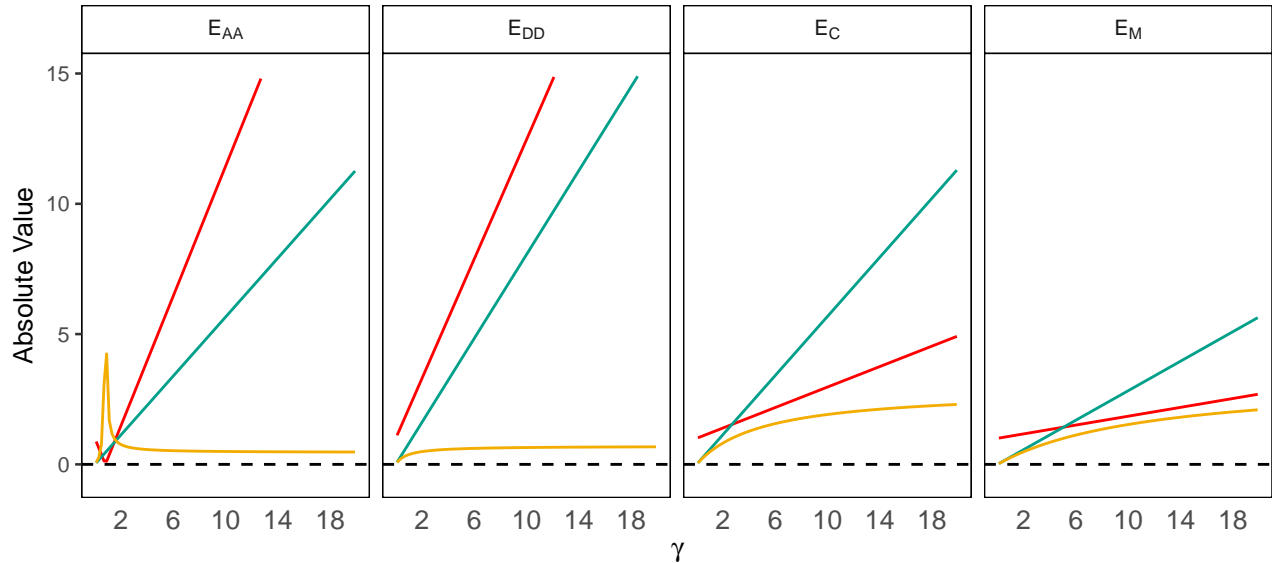

Supplement: Supplementary file 4 [file 2]

Genetic model    ● D    ●  $E_{AA}$     ●  $E_{DD}$     ●  $E_C$     ●  $E_M$

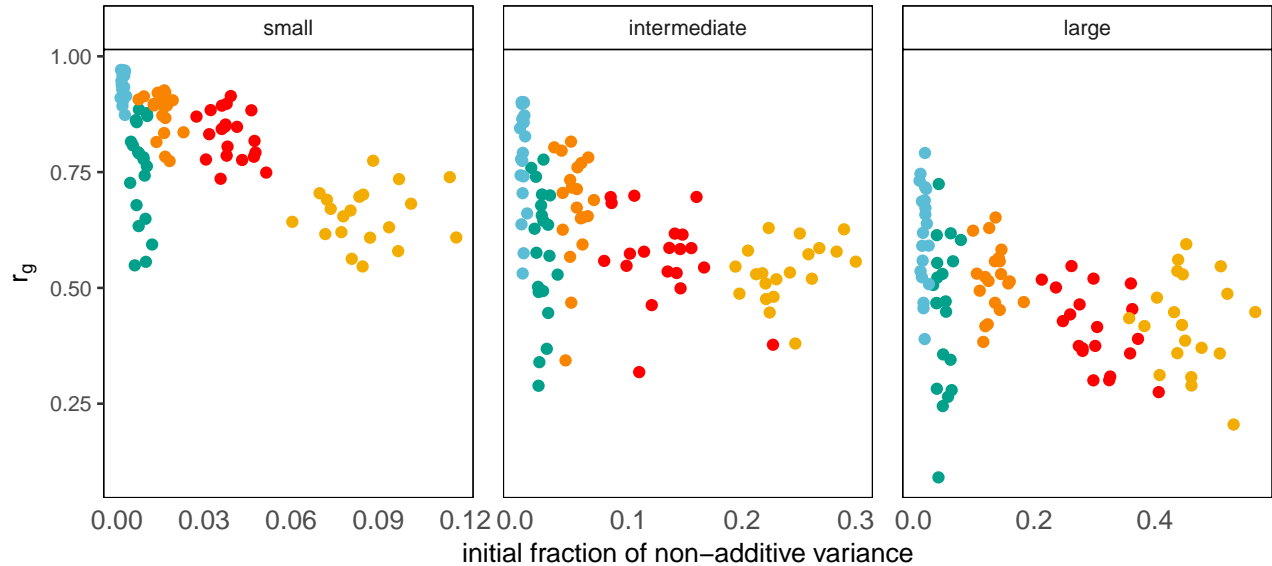

Supplement: Supplementary file 5 [file 2]

Magnitude — none — small — intermediate — large

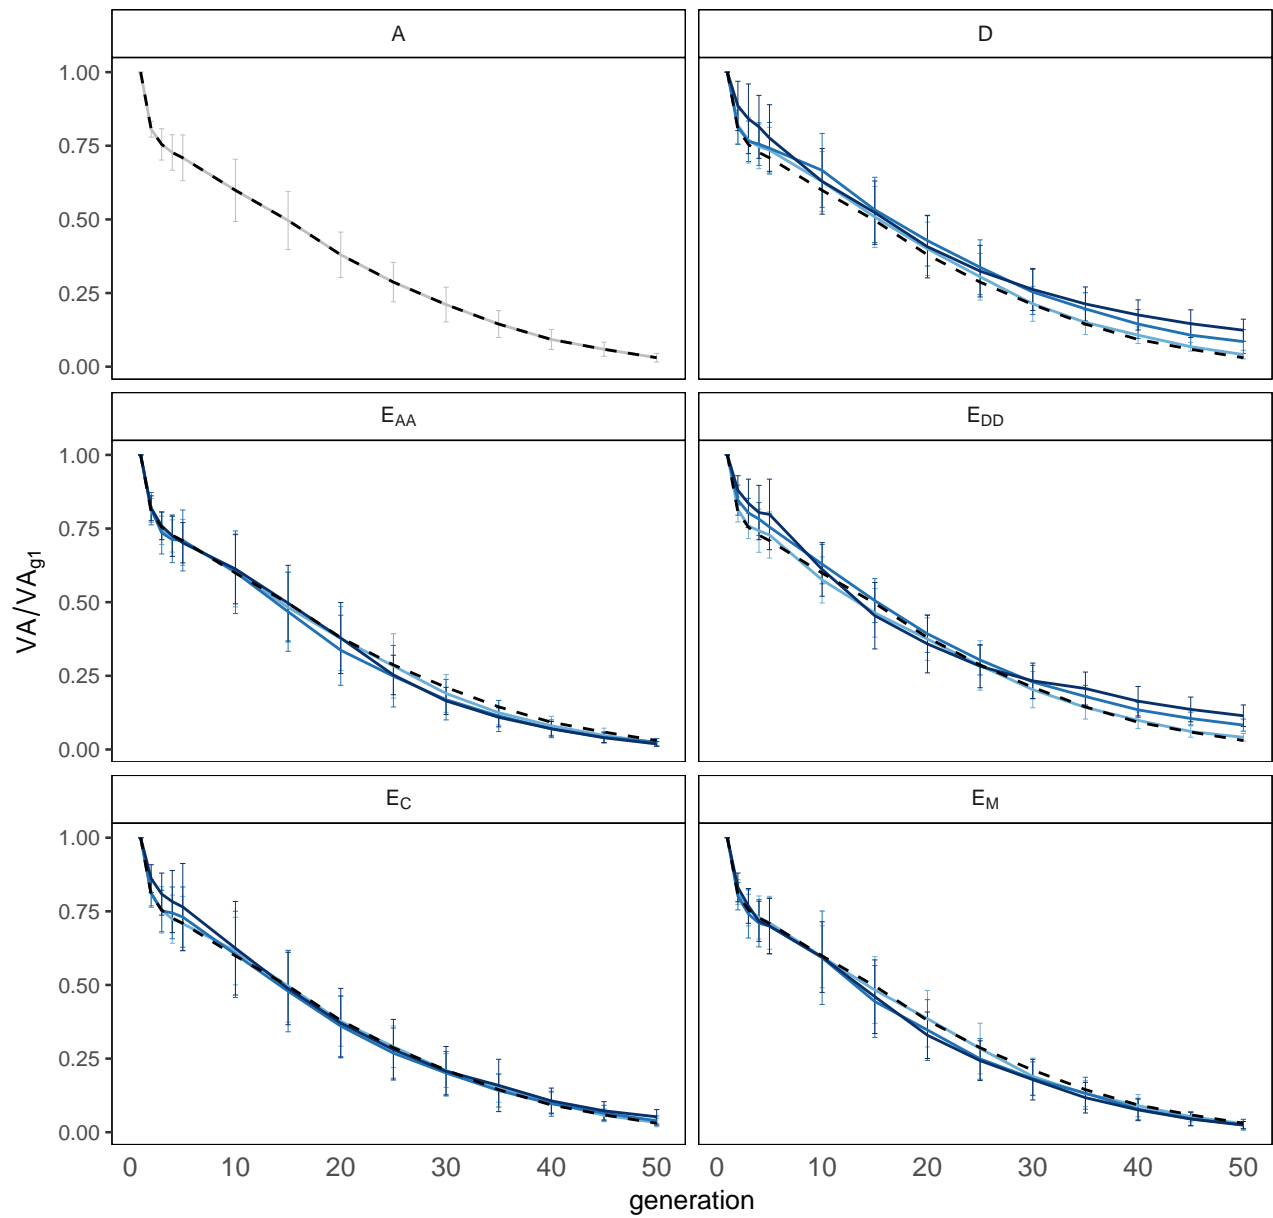

Supplement: Supplementary file 6 [file 2]

Genetic model

A  $E_{AA}$   $E_C$   
D  $E_{DD}$   $E_M$

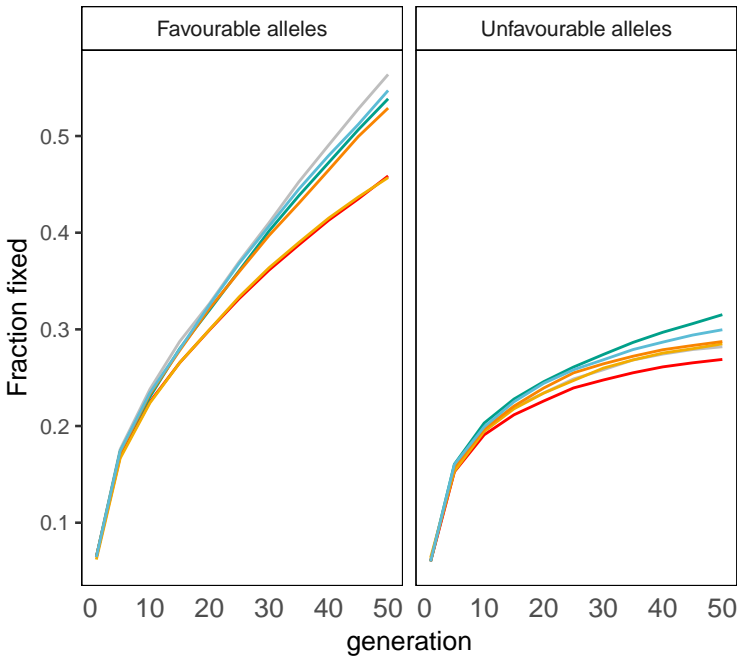

Supplement: Supplementary file 7 [file 2]
